# Supplementary material for: Short-term molecular and cellular effects of ischemia/reperfusion on vascularized lymph node flaps in rats
Source: PubMed Central journal article supplement (PMC7537894; doi:10.1371/journal.pone.0239517), 2020-10-06
Supplement: pone.0239517.s001.pdf [file pone.0239517.s001.pdf]

S1\_raw\_images

## **Short-term molecular and cellular effects of ischemia/reperfusion on vascularized lymph node flaps in rats**

Florian S. Frueh<sup>1,2\*</sup>, Bijan Jelvani<sup>1</sup>, Claudia Scheuer<sup>1</sup>, Christina Körbel<sup>1</sup>, Bong-Sung Kim<sup>2</sup>, Nicole Lindenblatt<sup>2</sup>, Pietro Giovanoli<sup>2</sup>, Yves Harder<sup>3</sup>, Emmanuel Ampofo<sup>1</sup>, Michael D. Menger<sup>1</sup> and Matthias W. Laschke<sup>1</sup>

*<sup>1</sup>Institute for Clinical and Experimental Surgery, Saarland University, 66421 Homburg/Saar, Germany*

*<sup>2</sup>Department of Plastic Surgery and Hand Surgery, University Hospital Zurich, University of Zurich, 8091 Zurich, Switzerland*

*<sup>3</sup>Division of Plastic, Reconstructive and Aesthetic Surgery, Ospedale Regionale di Lugano, Ente Ospedaliero Cantonale, 6900 Lugano, Switzerland*

### **\* Corresponding Author**

Florian S. Frueh, MD PhD  
Division of Plastic Surgery and Hand Surgery  
University Hospital Zurich  
Rämistrasse 100  
8091 Zurich  
Switzerland.  
Phone: +41 (0)44 255 11 11  
E-mail: florian.frueh@usz.ch

# Lymph node

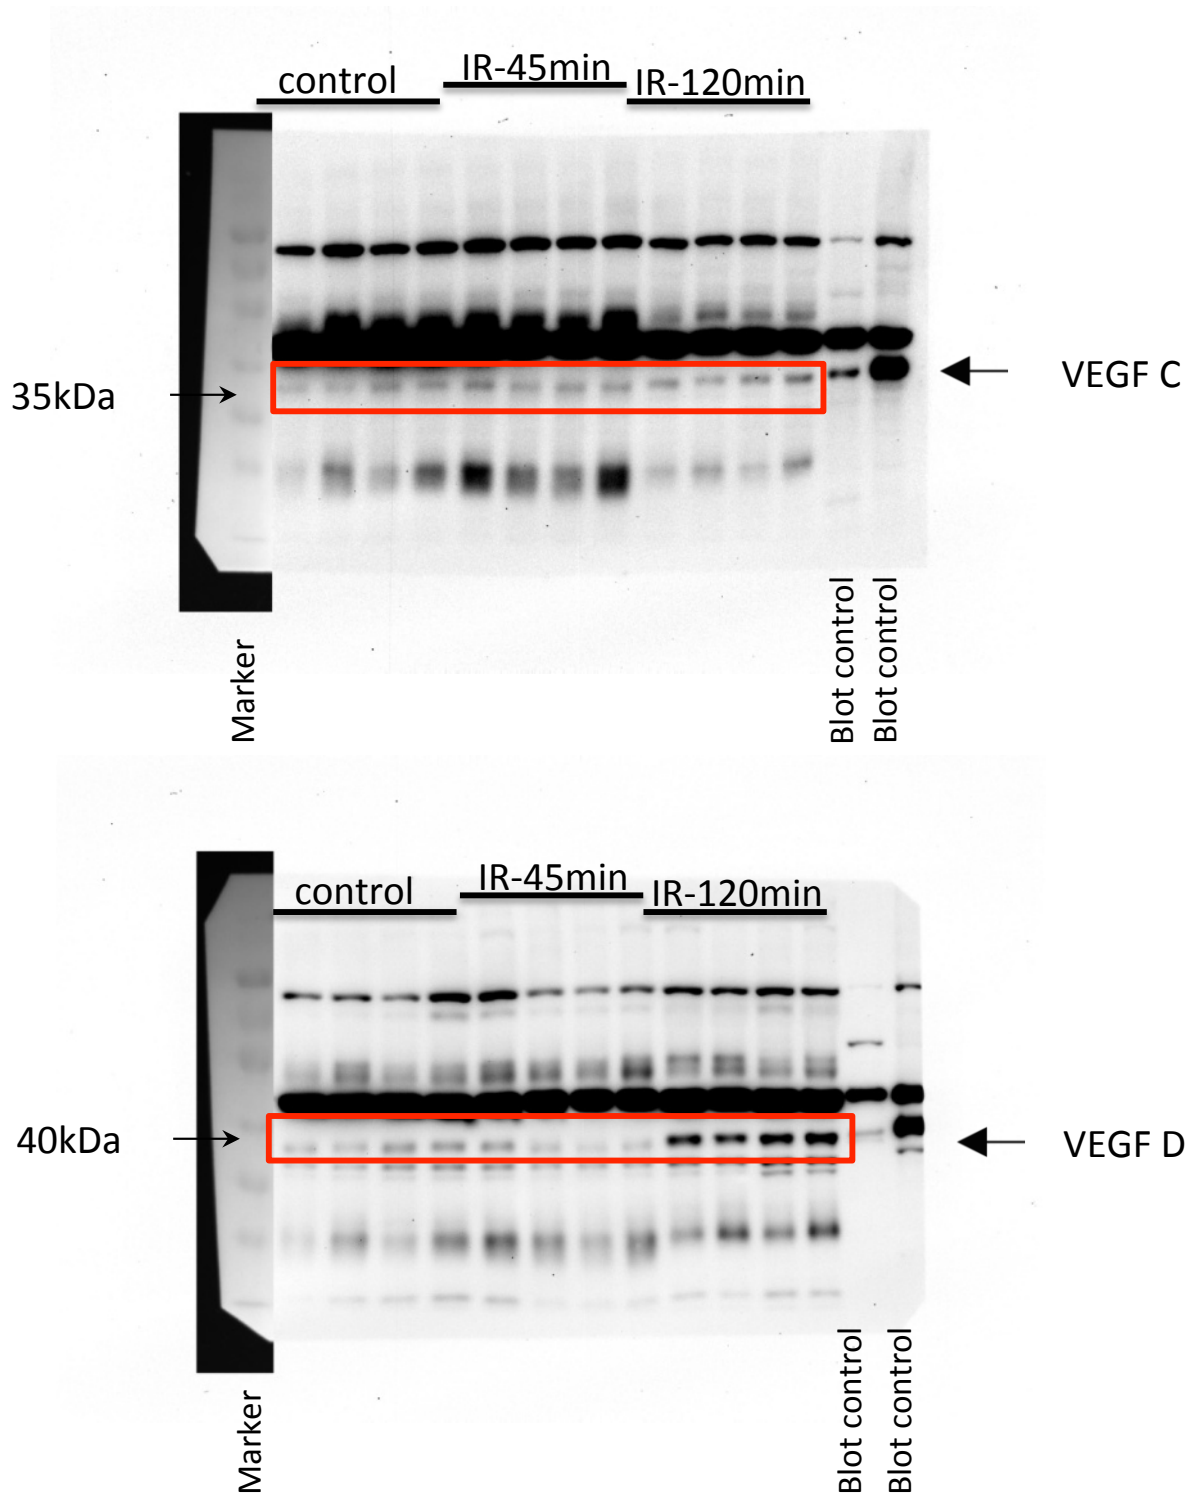

Uncropped images of blots presented in Fig. 5A

# Lymph node

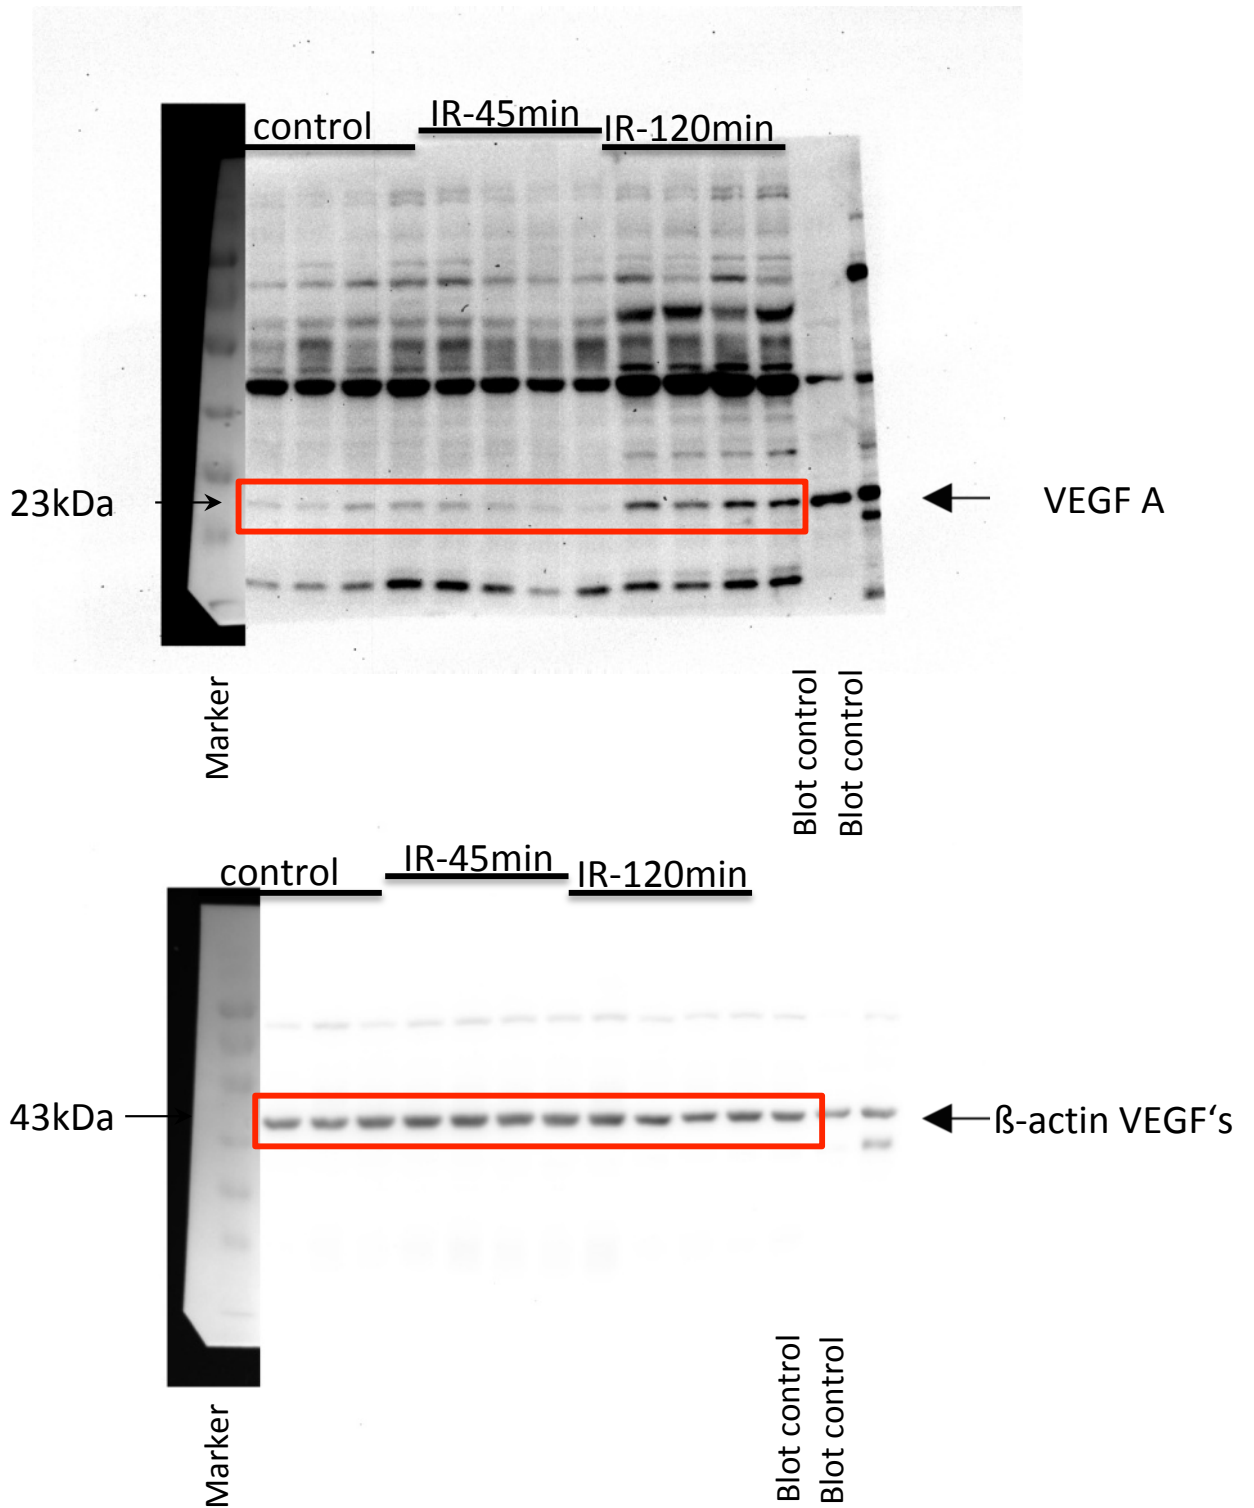

Uncropped images of blots presented in Fig. 5A

# Adipose tissue

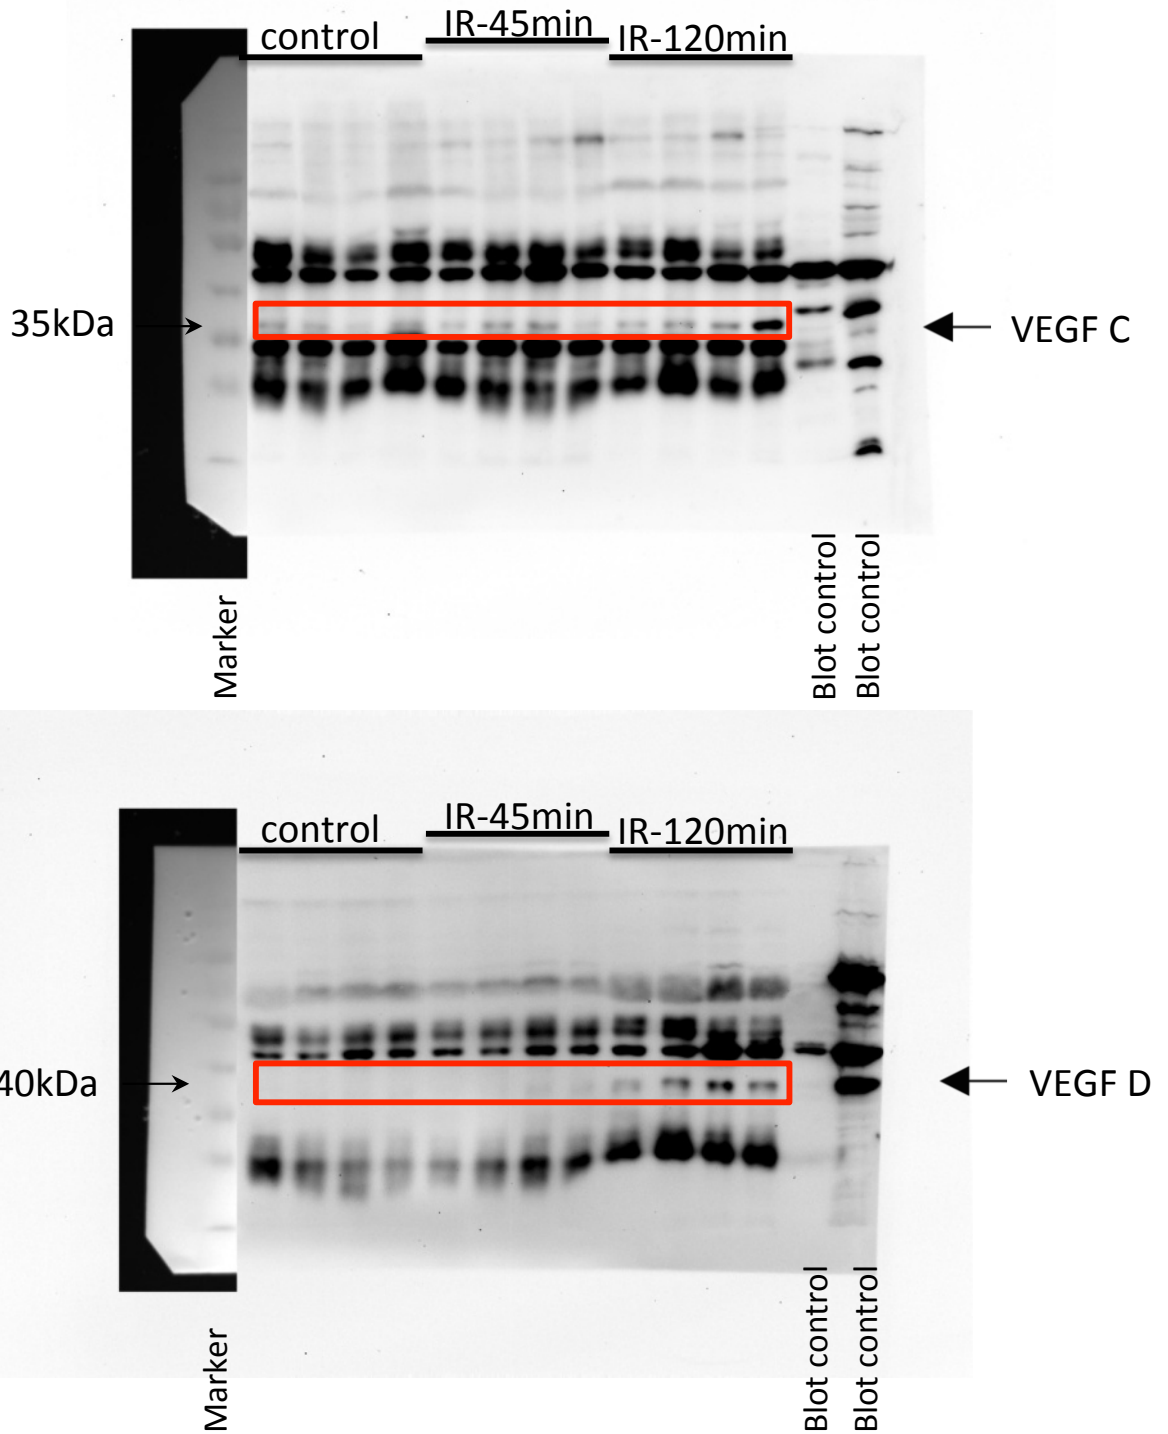

Uncropped images of blots presented in Fig. 5B

# Adipose tissue

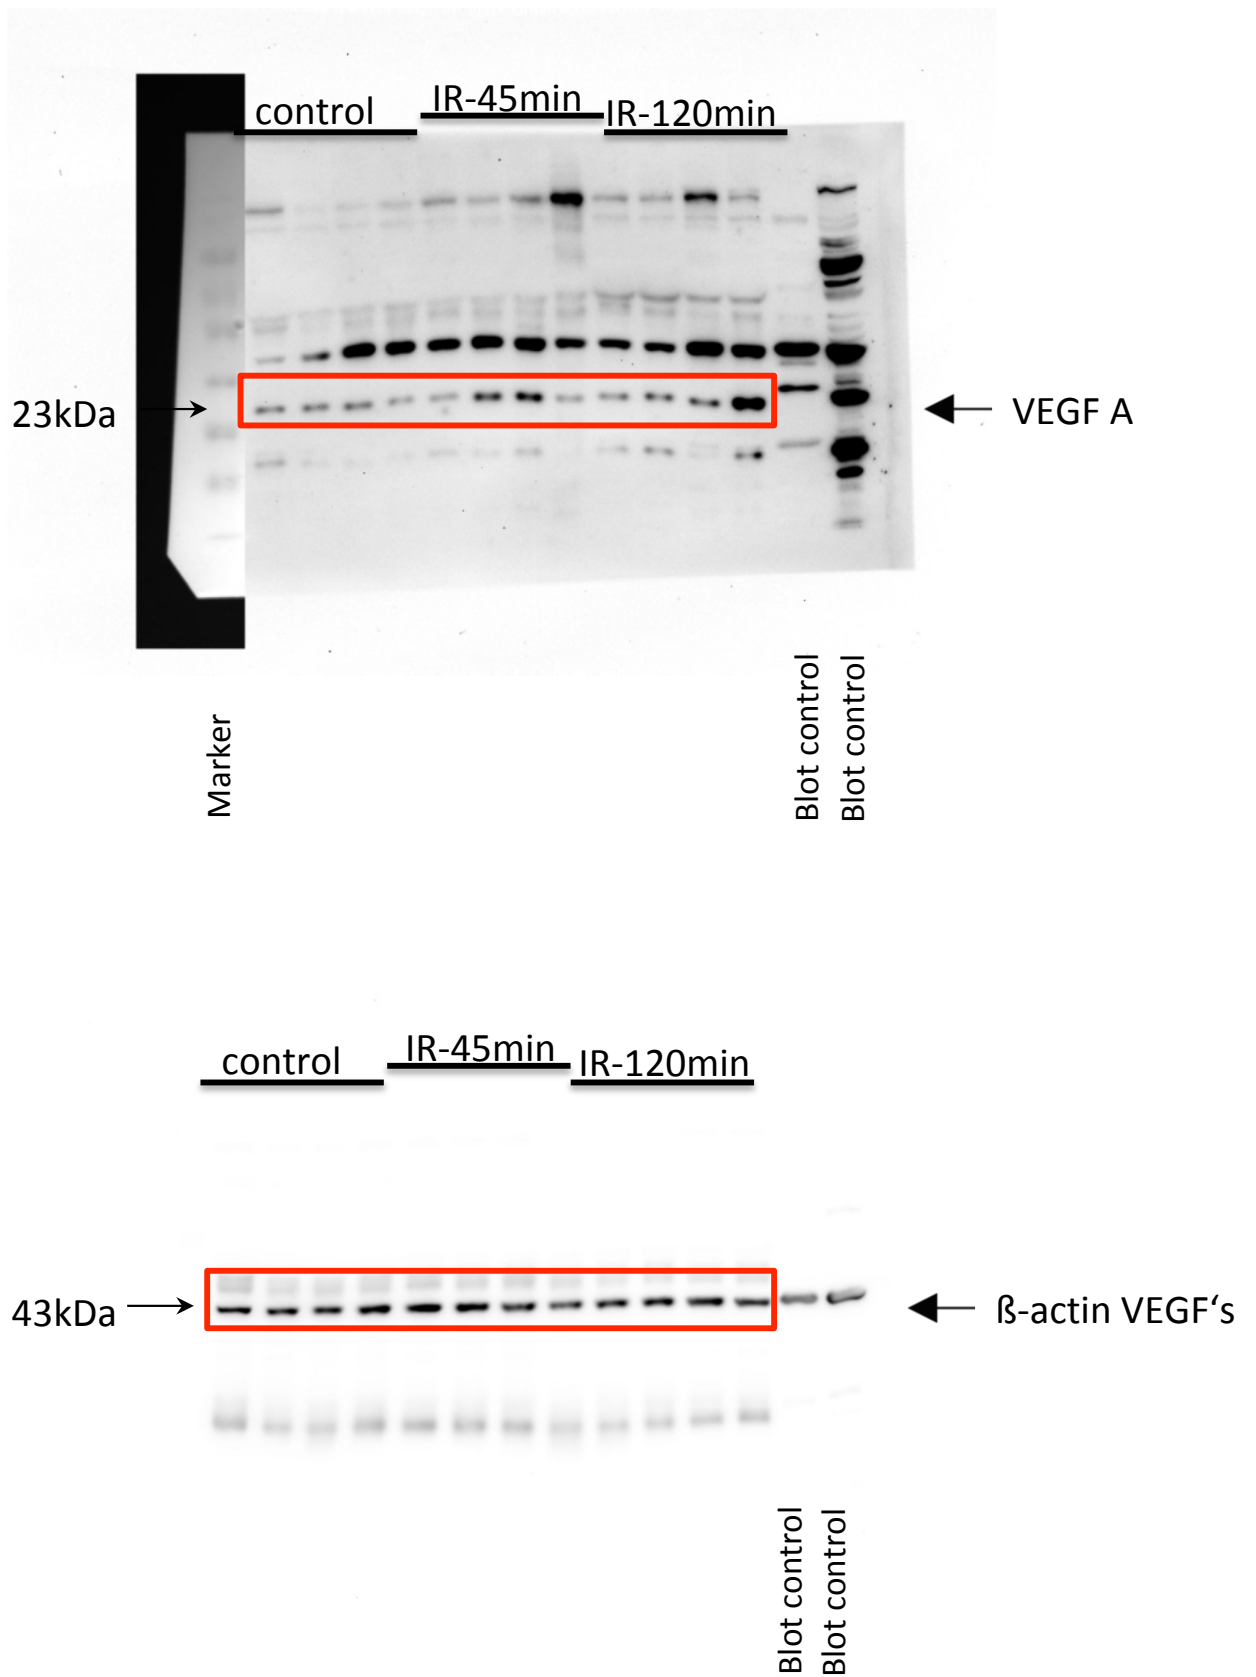

Uncropped images of blots presented in Fig. 5B

# Lymph node

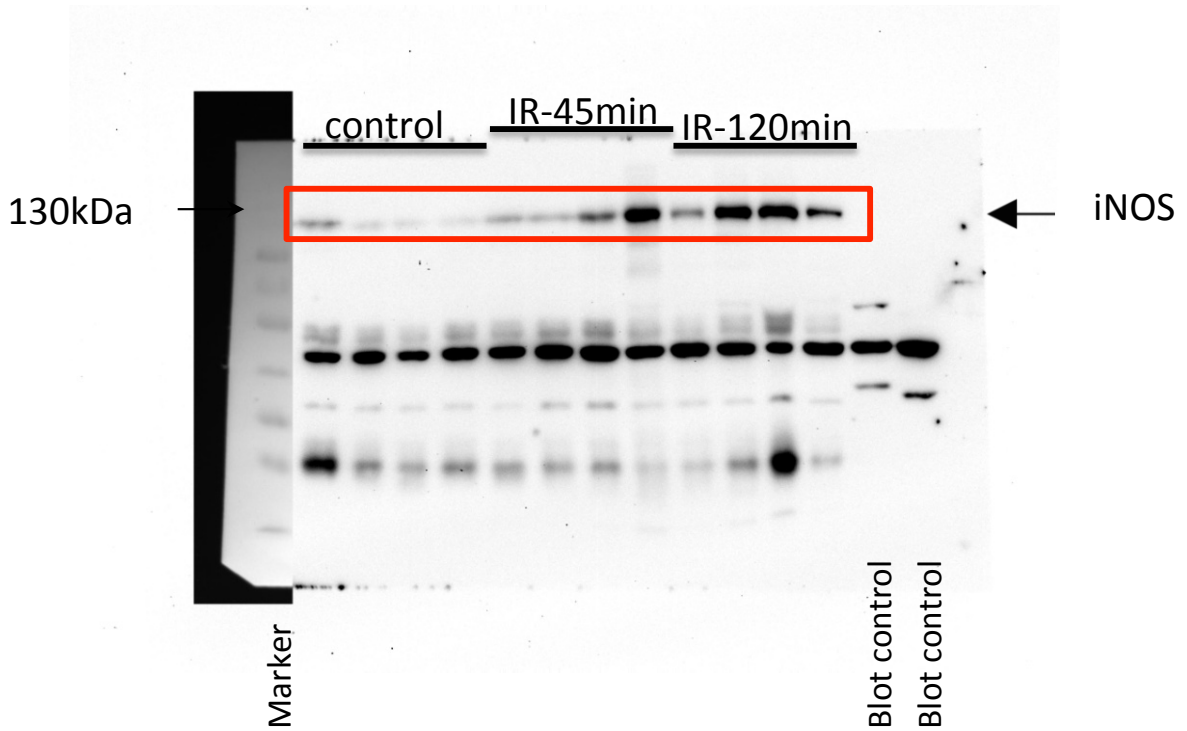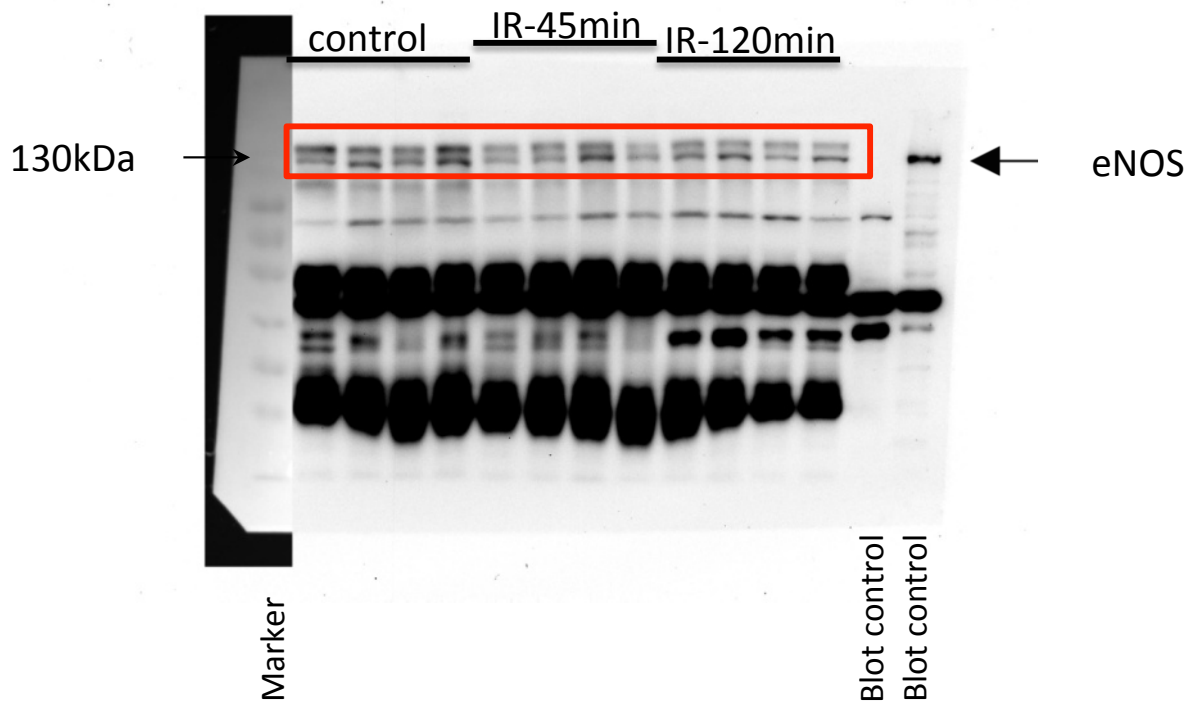

Uncropped images of blots presented in Fig. 5E

# Lymph node

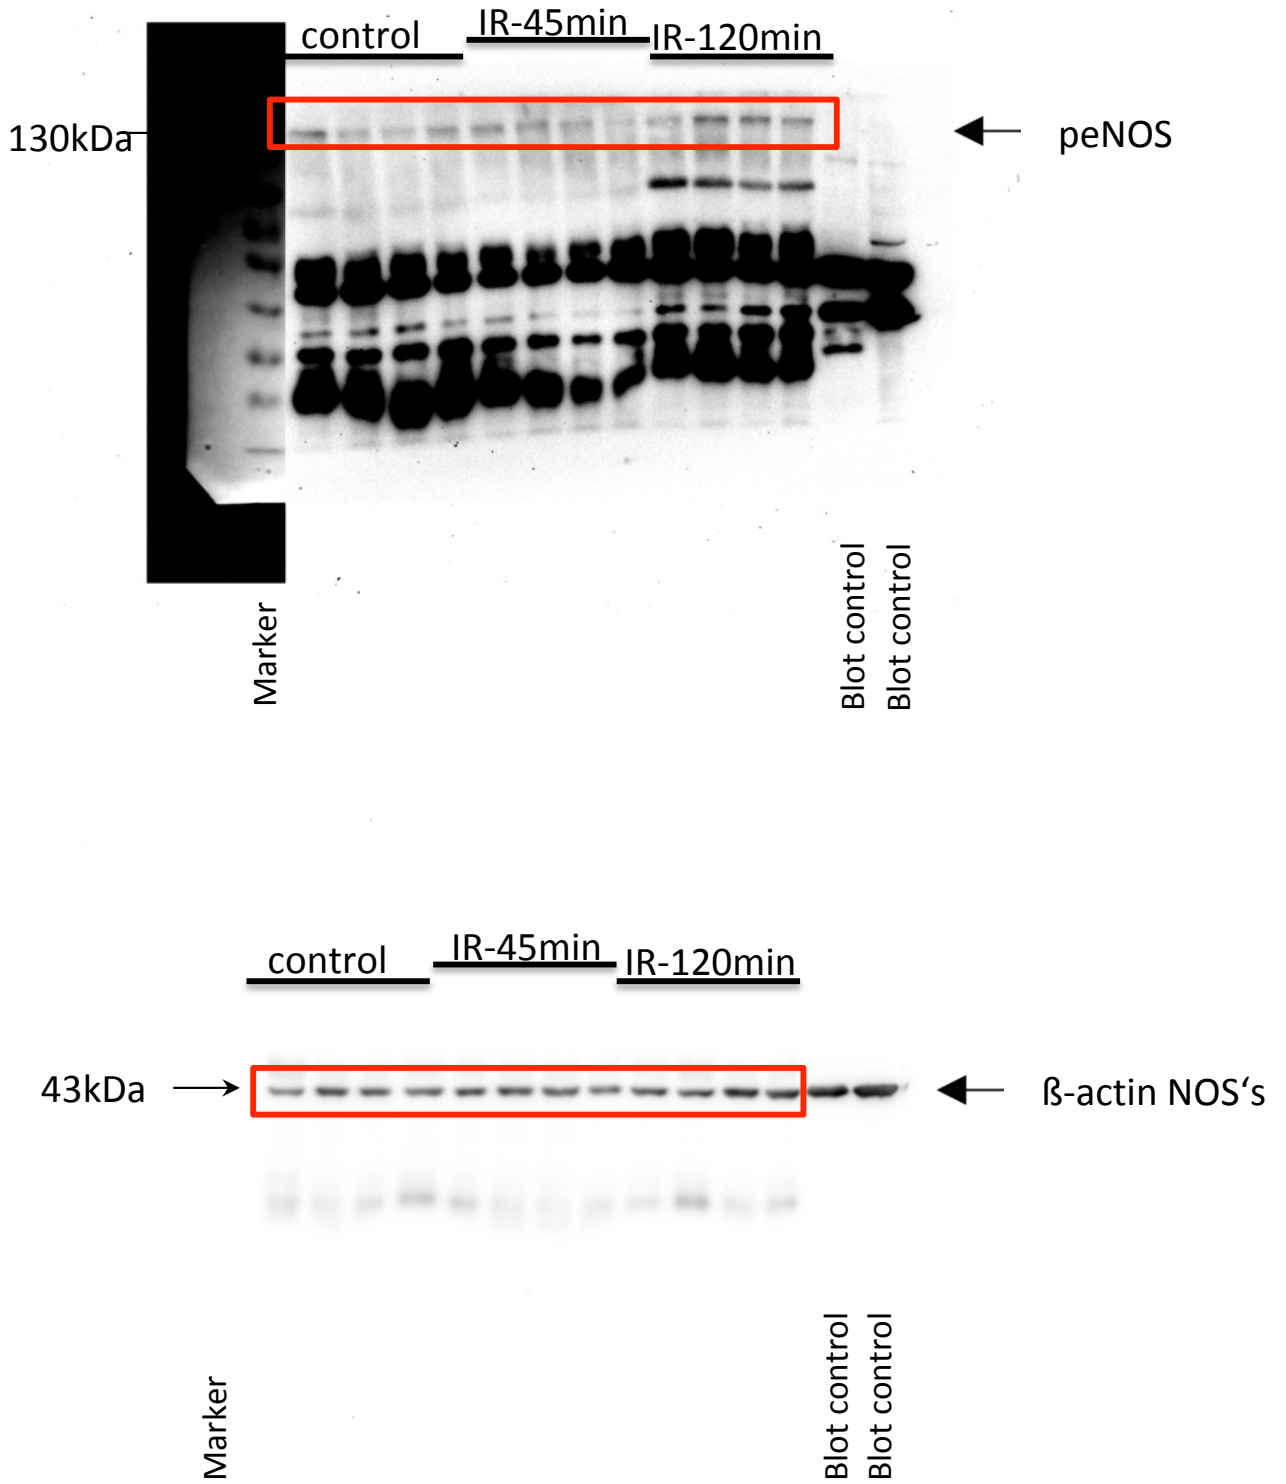

Uncropped images of blots presented in Fig. 5E

# Adipose tissue

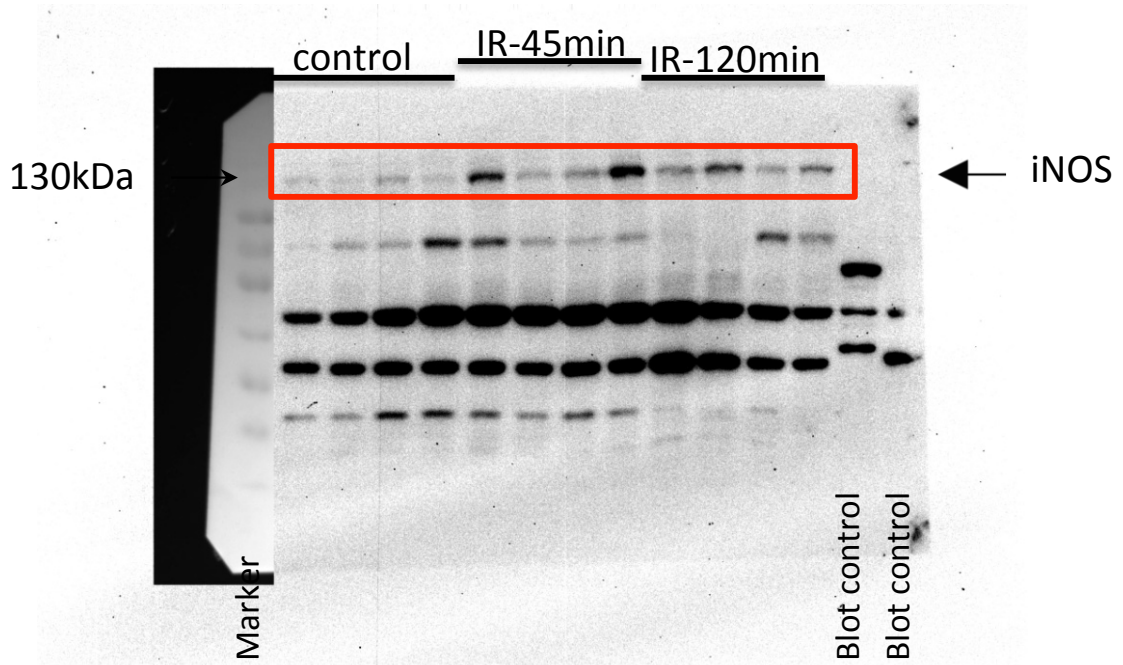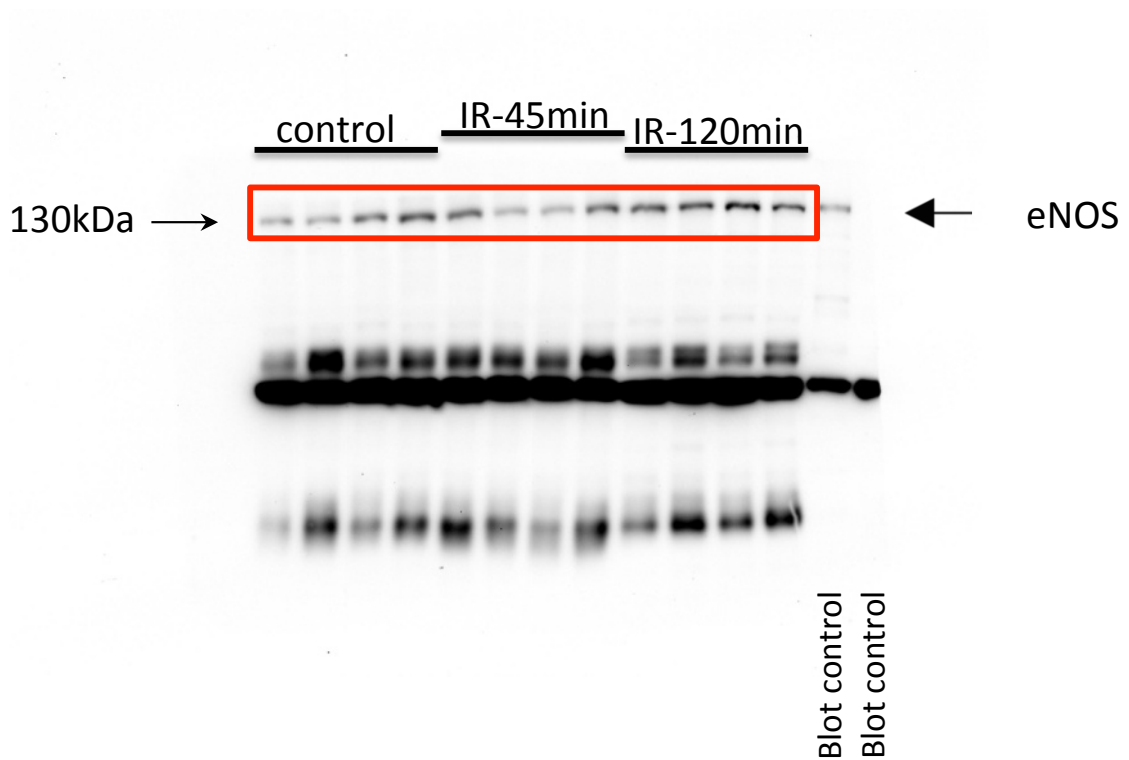

Uncropped images of blots presented in Fig. 5F



# Adipose tissue

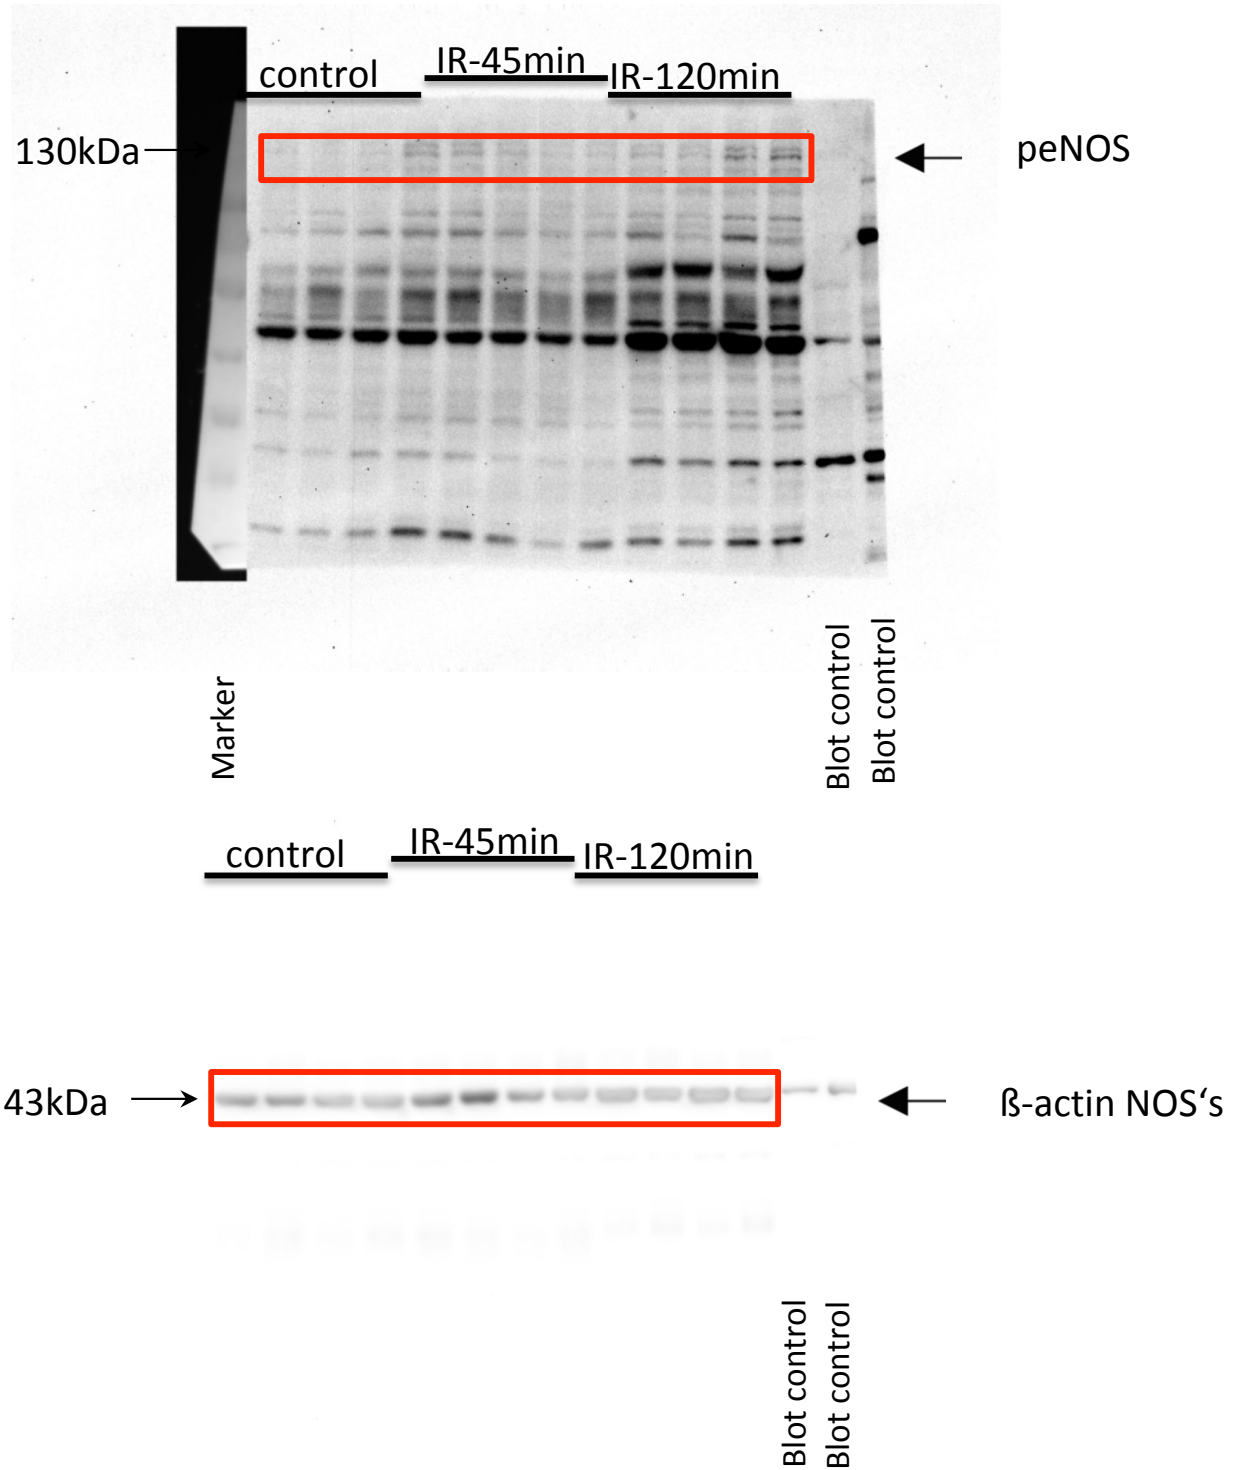

Uncropped images of blots presented in Fig. 5F
